# Supplementary material
Source: publisher figshare collection journal article supplement (https://frontiersin.figshare.com/ndownloader/files/26213189)
Supplement: Supplementary file [file 26213189]

## Supplemental Figure 1

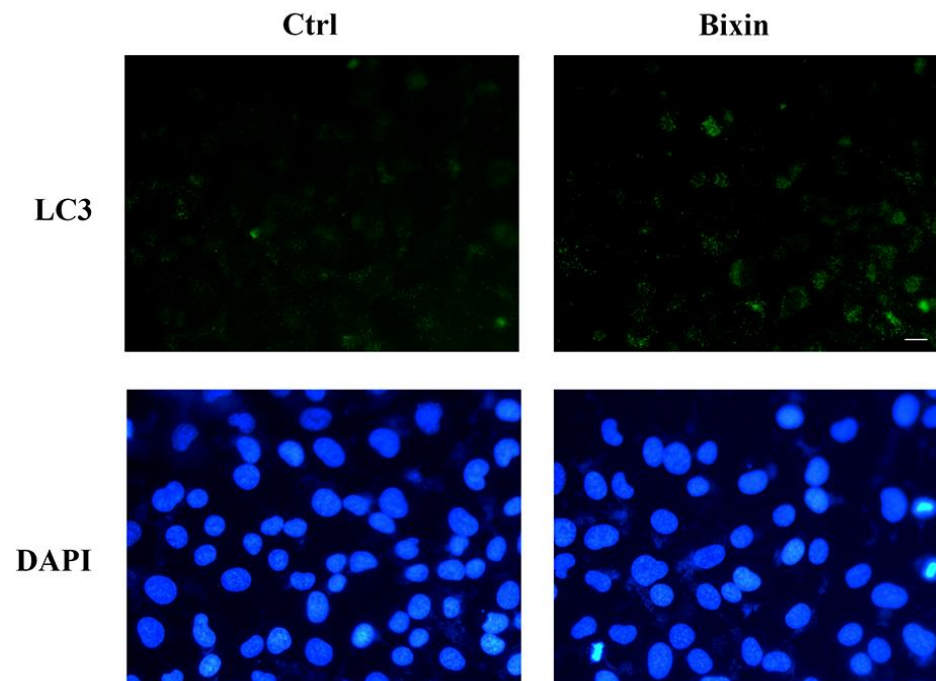

### Supplemental Figure Legend

**Supplemental Figure 1. Bixin induces the autophagy.** (A) After treated with bixin (40  $\mu$ M) for 24 h, HK2 cells were fixed and subjected to indirect immunofluorescence staining of LC3 (green); nucleus were stained with DAPI (the representative images were shown, scale bar = 100 $\mu$ m).
